# Supplementary material for: Investigation of the dispersion behavior of fluorinated MWCNTs in various solvents
Source: Royal Society of Chemistry journal article supplement (doi:10.1039/c7cp04536k), 2017-01-01
Supplement: c7cp04536k1.pdf [file c7cp04536k1.pdf]

## Supporting Information

### Investigation of dispersion behavior of fluorinated MWCNTs in various solvents

*Yang Liu,<sup>a</sup> Yichun Zhang,<sup>a</sup> Zaoming Wang<sup>a</sup>, Wenchuan Lai<sup>a</sup>, Xiaojiao Zhang<sup>a</sup>, Xu Wang<sup>a\*</sup> and Xiangyang Liu<sup>a\*</sup>*

<sup>a</sup> College of Polymer Science and Engineering, State Key Laboratory of Polymer Material and Engineering, Sichuan University, Chengdu 610065, People's Republic of China.

\* Corresponding author Tel.:+86 28 85403948; fax: +86 28 85405138.

E-mail address: [lxy6912@sina.com](mailto:lxy6912@sina.com) (Xiangyang Liu), [wangxu@scu.edu.cn](mailto:wangxu@scu.edu.cn) (Xu Wang).

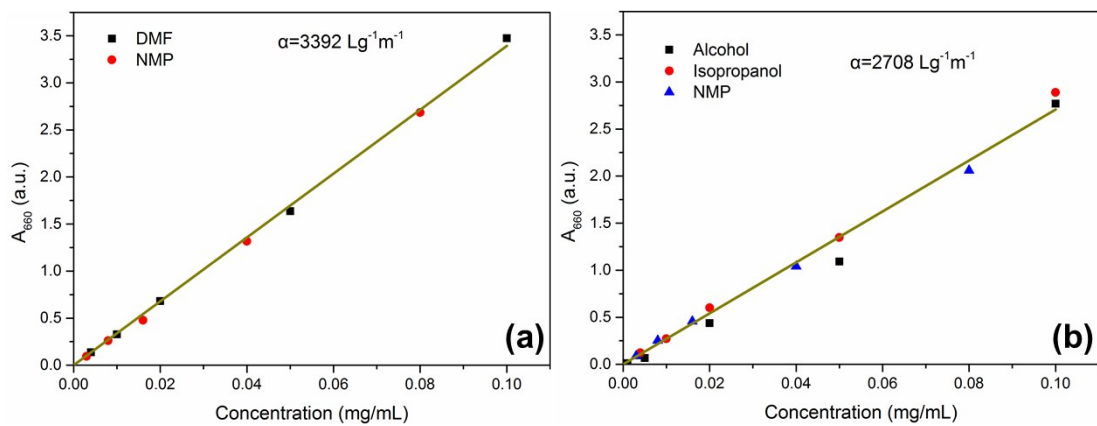

Figure S1. Absorbance at 660 nm as a function of concentration of IF-MWCNTs (a) and hF-MWCNTs (b) in

various solvents.

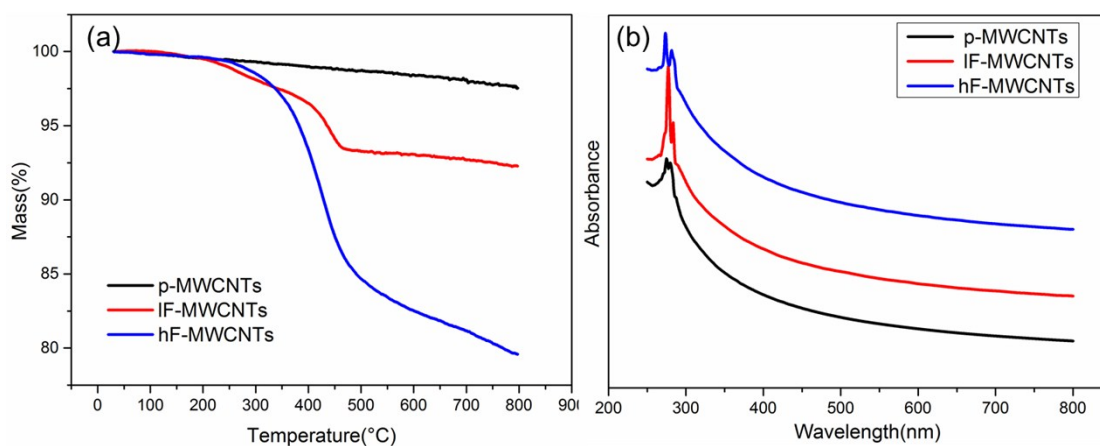

Figure S2. TGA (a) and UV-vis spectrum (b) of p-MWCNTs, IF-MWCNTs, hF-MWCNTs

Figure S2a demonstrates the TGA curves of IF-MWCNTs and hFMWCNTs. An obvious weight loss between 200 °C and 500 °C in nitrogen atmosphere is observed for both samples, manifesting the success grafting of fluorine atoms onto MWCNTs. More fluorine atoms are covalently bonded onto the surface of hF-MWCNTs with 20% of weight loss at 800 °C, while it is only 7% for IF-MWCNTs. UV-vis spectra of p-MWCNTs, IF-MWCNTs and hF-MWCNTs are shown in Figure S2b. The absorption peaks situated in 277nm are attributed to  $\pi$ - $\pi^*$  transitions corresponding to aromatic regions in MWCNTs. It is interesting to find that the aromatic regions remain in hF-MWCNTs. The TGA and UV-vis spectra data primarily demonstrate the co-existence of fluorinated regions and aromatic regions in IF-MWCNTs and hF-MWCNTs.

**Table S1.** Surface compositions and assignments of C 1s Components for IF-MWCNTs and hF-

## MWCNTs

| component | assignment        | p-MWCNTs      |                   | IF-MWCNTs     |                   | hF-MWCNTs     |                   |
|-----------|-------------------|---------------|-------------------|---------------|-------------------|---------------|-------------------|
|           |                   | Position (eV) | concentration (%) | position (eV) | concentration (%) | position (eV) | concentration (%) |
| C(1)      | sp <sup>2</sup> C | 284.56        | 72.0              | 284.6         | 62.0              | 284.6         | 45.0              |
| C(2)      | Sp <sup>3</sup> C | 285.58        | 22.3              | 285.4         | 21.6              | 285.6         | 17.0              |
| C(3)      | C-O               | 286.94        | 5.7               | 287.0         | 7.7               | 287.0         | 7.4               |
| C(4)      | C=O               |               |                   | 288.5         | 2.2               | 288.6         | 8.6               |
| C(5)      | C-F               |               |                   | 289.6         | 3.3               | 289.6         | 15.8              |
| C(6)      | CF <sub>2</sub>   |               |                   | 291.2         | 3.2               | 291.2         | 6.2               |

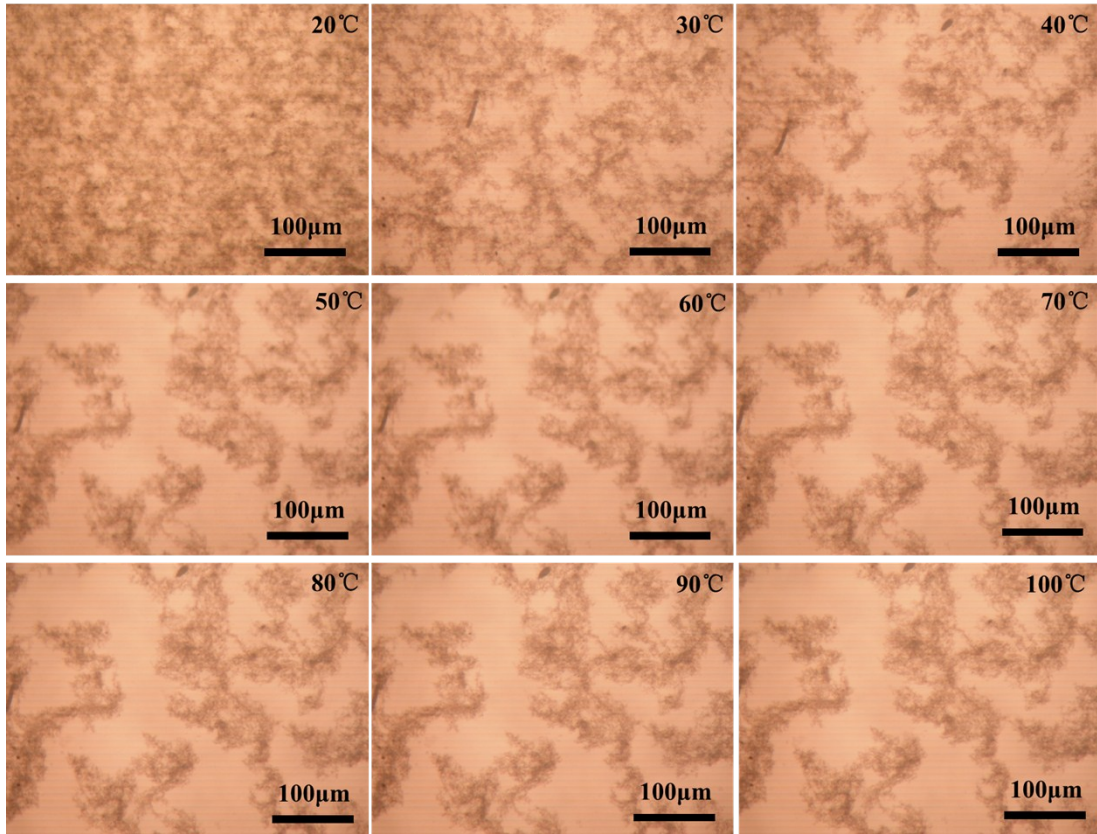

Figure S3. Dispersion state of p-MWCNTs in epoxy at elevated temperature from 20 to 100 °C.
